# Supplementary material for: Genetic characterization of clinical and agri-food isolates of multi drug resistant Salmonella enterica serovar Heidelberg from Canada
Source: Springer Nature journal article supplement (doi:10.1186/1471-2180-8-89), 2008-06-06

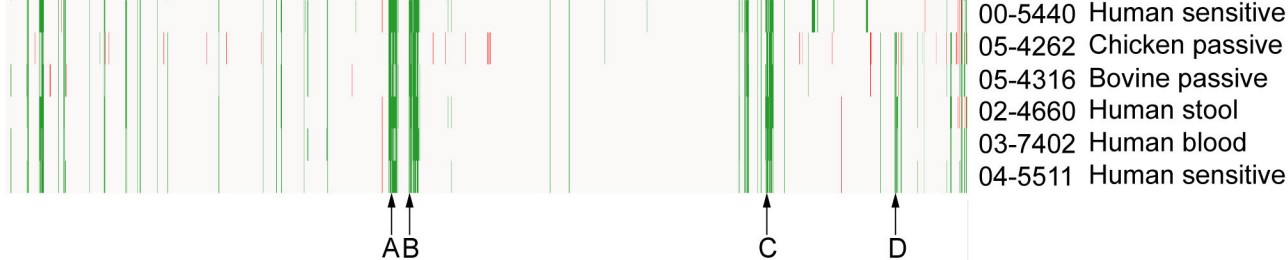

Supplement: 12866_2008_522_MOESM2_ESM.pdf [file 12866_2008_522_MOESM2_ESM.pdf]
